# Supplementary material for: Circulating miR-28-5p is overexpressed in patients with sarcopenia despite long-term remission of Cushing’s syndrome: a pilot study
Source: Front Endocrinol (Lausanne). 2024 Jul 17;15:1410080. doi: 10.3389/fendo.2024.1410080 (PMC11289718; doi:10.3389/fendo.2024.1410080)
Supplement: Supplementary Table 1 — Identification of differentially expressed miRNAs by small RNA-sequencing. [file Table1.xlsx]

## Sheet: edgeR.p.value.resultsFDR
	logFC	logCPM	F	PValue	FDR
hsa-miR-495-3p	6.48272049607392	3.8468527700402	12.78815327607	0.000383977847545314	0.0267366389362935
hsa-miR-654-5p	6.56501138851633	4.68634420960914	12.523692190415	0.000440713828620222	0.0267366389362935
hsa-miR-28-5p	8.36416404059073	4.41153878739802	18.4079552841714	2.15532611756692e-05	0.00392269353397179
hsa-miR-200c-3p	5.38802040040165	3.6743681121093	10.3182213497399	0.00140524755629766	0.0639387638115434
hsa-miR-451a	-1.33046046557103	14.3693297553224	7.39150715538976	0.00678930901311503	0.242106107458751
hsa-let-7c-5p	-2.0403380977047	11.2391724533387	7.09658109999189	0.00798152002611266	0.242106107458751
hsa-miR-148b-3p	4.27145866437004	7.40758758451723	6.30151460400936	0.0123895944968739	0.286425435456819
hsa-miR-150-3p	3.7341221408331	8.24373006615234	5.94568951407356	0.0151130298403664	0.286425435456819
hsa-miR-628-3p	-4.2351503945131	9.09117817032486	6.14259186273567	0.0160639515993988	0.286425435456819
hsa-miR-18a-3p	4.09260136719123	7.17712588004586	5.70418794595608	0.017308010067954	0.286425435456819
hsa-miR-221-3p	2.46245508956911	10.0341155396789	5.70383719934803	0.0173114274177198	0.286425435456819
hsa-miR-6777-5p	3.85214512983667	5.23877747540737	5.21385094737797	0.0228415093268596	0.346429558124037
hsa-miR-10527-5p	3.61982602120408	5.00787061025883	4.79454756422935	0.0290280735465239	0.371778274267293
hsa-miR-664a-5p	3.60485748594157	5.0866161187243	4.74282488861225	0.029904319502312	0.371778274267293
hsa-miR-140-3p	-3.2151899871011	10.6572243244698	4.95800639820958	0.03199842908961	0.371778274267293
hsa-miR-425-3p	3.50667723057724	4.99388943537388	4.55646141077711	0.0332980253405389	0.371778274267293
hsa-miR-1307-3p	3.56336122728805	5.50753110260778	4.48389418879605	0.03472654210189	0.371778274267293
hsa-miR-223-5p	3.47790561574244	5.41296115631472	4.33644090418021	0.037831010697632	0.377107598009495
hsa-miR-6511b-3p	-3.46134674879454	6.90099980855259	4.19404050444594	0.0411070296571303	0.377107598009495
hsa-miR-183-5p	2.96873164091677	8.32742455693772	4.0111666016112	0.0457638275120143	0.377107598009495
hsa-miR-185-5p	-2.99621616994379	8.20476355519468	4.00892319577977	0.0458191732939849	0.377107598009495
hsa-miR-433-3p	3.21846311166089	4.99525892122811	3.96086313476928	0.0471336035409631	0.377107598009495
hsa-miR-191-3p	3.31210433413355	5.54300211818629	3.91781786043193	0.0483447685424985	0.377107598009495
hsa-miR-125a-5p	-1.28293879136549	12.2367575633372	3.87001655623055	0.0497284744627906	0.377107598009495
hsa-miR-182-5p	-3.00705419684863	7.47866764746347	3.54791463563918	0.0602214154531217	0.438411904498726
hsa-miR-122-5p	-1.02540405210151	13.5369419055085	3.47827399998045	0.0630837529093548	0.441586270365484
hsa-miR-885-5p	2.05842174541073	9.630605916277	3.36692080440964	0.0674349762841831	0.450199853601301
hsa-miR-144-5p	-3.02006053582041	5.64145842572841	3.31519155662495	0.0692615159386617	0.450199853601301
hsa-miR-1-3p	2.90079909829171	5.61863393076973	3.08090431267842	0.0798510099809048	0.490073930094652
hsa-miR-100-5p	-2.75329389904954	4.87366974356983	3.06194293396806	0.080781417048569	0.490073930094652
hsa-miR-574-3p	2.63504030177176	7.23300419786737	2.72662069450765	0.0993385057226143	0.583213162629542
hsa-miR-409-3p	1.45834369950277	10.3722329336626	2.56692891167024	0.109773767471069	0.590591857996996
hsa-miR-3615	-1.77167717515706	9.52707688250025	2.56056334855435	0.110214015507767	0.590591857996996
hsa-let-7d-5p	-1.54984640959155	12.1021133015938	2.66287559705906	0.11033034709834	0.590591857996996
hsa-miR-432-5p	1.57997469167635	10.0224965043483	2.48499724426099	0.115591890515151	0.601077830678787
hsa-miR-10b-5p	-1.28510398132847	10.8031190426069	2.4091890999454	0.121280429294005	0.613139948097471
hsa-miR-5010-5p	-2.47222427788789	5.87050121084657	2.29207154171544	0.130690964494121	0.63535165830047
hsa-miR-629-5p	-2.07108600080956	8.58050204638058	2.23939521916913	0.135187349977063	0.63535165830047
hsa-miR-584-5p	2.21847129721683	7.85838464272869	2.22840946076496	0.136146783921529	0.63535165830047
hsa-miR-3173-5p	-1.85696361325726	8.90053058352435	2.07109494406631	0.150762057162456	0.677389649604044
hsa-miR-16-5p	-0.978188963494736	11.7993394880467	2.05255243368511	0.152598767218493	0.677389649604044
hsa-miR-193a-5p	1.8174419341246	8.8347092762327	1.98134468704835	0.159892664992503	0.692868214967512
hsa-miR-92a-3p	-0.44776295487597	17.3273435851009	1.62048136557727	0.203637636766685	0.861908137012481
hsa-miR-3168	-1.95311962960408	6.84992678413137	1.58458497695809	0.208710149712428	0.863301073810498
hsa-let-7d-3p	0.778014916476962	12.0877900704885	1.48216810336877	0.224030638381992	0.887952051938594
hsa-miR-23a-5p	1.85226838312766	7.46550526846761	1.45124773952321	0.22891836092875	0.887952051938594
hsa-miR-29a-3p	1.70948474752971	8.27987000270507	1.44882772413006	0.229306299127	0.887952051938594
hsa-miR-151a-5p	1.885974001266	6.71617189193239	1.41043517165303	0.235568425691852	0.893196947414941
hsa-miR-146b-5p	1.78953751762527	7.48135290941051	1.36322251455481	0.243556371640573	0.904637951807842
hsa-miR-106b-3p	1.71719365591424	7.49553583553875	1.29940391769215	0.254887634600736	0.927790989946678
hsa-miR-192-5p	1.72074832092193	5.1071473174426	1.26320696044981	0.261603744361516	0.933566303407763
hsa-miR-501-3p	-1.49385856577766	8.23551041183116	1.14012472661617	0.286159867198889	0.996015708285629
hsa-miR-142-5p	-1.17372378358068	9.36399086279542	1.09135617812113	0.296693969082595	0.996015708285629
hsa-miR-30d-5p	-0.503100930176029	14.1861668092858	1.07990000708593	0.299240347034009	0.996015708285629
hsa-miR-10a-5p	0.897673977826191	10.7110279051857	1.06401159581191	0.30330788982982	0.996015708285629
hsa-miR-543	-1.56142413297645	7.41183367276095	1.04806383781598	0.306466371780193	0.996015708285629
hsa-miR-98-5p	1.21953093166775	9.08191873277235	1.00027170463738	0.317746034476087	0.996944329911851
hsa-miR-375-3p	0.945066018574175	10.0708416959856	0.969883423602745	0.325202789919492	0.996944329911851
hsa-miR-877-5p	1.46739556681727	7.3923826578773	0.952389462050142	0.329600806239655	0.996944329911851
hsa-miR-28-3p	1.35707743650961	8.02919251530053	0.913693300616492	0.339614999409898	0.996944329911851
hsa-miR-101-3p	1.20171222682971	8.8310466906014	0.875409579337273	0.349930045385727	0.996944329911851
hsa-let-7b-3p	1.31968676295324	3.86113024859212	0.850135969281939	0.356974640348395	0.996944329911851
hsa-miR-151a-3p	1.05064108492543	9.12129439404598	0.789882786862477	0.374578390471375	0.996944329911851
hsa-let-7a-5p	-0.351620322174272	16.1103622315047	0.767824665954671	0.381326848845949	0.996944329911851
hsa-miR-4732-3p	1.03400553831863	9.06911751437361	0.72795510033535	0.393970135636957	0.996944329911851
hsa-miR-342-3p	0.886573705177942	9.60539601759676	0.700105521877675	0.403162414300131	0.996944329911851
hsa-miR-4433b-5p	-0.495869514587831	12.8138465884656	0.697960276716042	0.403883382026764	0.996944329911851
hsa-miR-30b-5p	-1.22851947389386	5.64989049546572	0.628024935612748	0.428470143118043	0.996944329911851
hsa-miR-181a-5p	0.776240959344247	10.5593015029289	0.631646387140501	0.428616450562693	0.996944329911851
hsa-miR-485-3p	-0.997014959671422	8.90117006473323	0.62562638814392	0.429352721478395	0.996944329911851
hsa-miR-485-5p	1.17189806422253	7.33193508776322	0.601134216122441	0.438525387214151	0.996944329911851
hsa-miR-625-3p	1.08969726616497	7.72233501375249	0.557311331959936	0.455709139633102	0.996944329911851
hsa-miR-26a-5p	-0.452793089179278	12.4744163085222	0.55512483178025	0.45659395063187	0.996944329911851
hsa-miR-181b-5p	1.16947384524571	6.30417841844194	0.55471072525167	0.456761832434378	0.996944329911851
hsa-miR-126-5p	1.11966902193177	5.31779728323156	0.533135658542628	0.465645864352196	0.996944329911851
hsa-miR-27b-3p	1.09146488591313	7.39854680938211	0.530780464215318	0.466632336074795	0.996944329911851
hsa-miR-146a-5p	-0.720938836763502	10.8358523981334	0.507609608592614	0.47889979186403	0.996944329911851
hsa-miR-223-3p	0.585015893751838	10.6295346829041	0.492011349010075	0.483369598279965	0.996944329911851
hsa-let-7e-5p	0.705168543523182	9.75489904193661	0.472657696516255	0.492097345776192	0.996944329911851
hsa-miR-494-3p	-1.06586091534625	5.99417515271656	0.466524137913302	0.494918383819405	0.996944329911851
hsa-miR-1908-5p	-1.06661638029155	6.24306368044623	0.460696236272202	0.497624160066869	0.996944329911851
hsa-miR-197-3p	0.615008151654808	10.311925360595	0.455873171532534	0.499882391107473	0.996944329911851
hsa-miR-652-3p	-0.680037500138272	9.7468734516059	0.427095134964992	0.513729059758	0.996944329911851
hsa-miR-329-3p	-0.984128179039936	7.19692643824201	0.420648681680288	0.516922067146504	0.996944329911851
hsa-miR-483-5p	0.527387304026542	10.7631730811731	0.407779121601568	0.523401854627209	0.996944329911851
hsa-miR-92b-3p	0.688039673646587	9.41733759020772	0.404519109022653	0.52506612154997	0.996944329911851
hsa-miR-30e-5p	-0.623961738444198	9.90505969042973	0.394140167030104	0.530428128584215	0.996944329911851
hsa-miR-134-5p	0.905472861948066	7.57981344283251	0.375293653695095	0.540421407526114	0.996944329911851
hsa-miR-139-5p	0.933213558956445	6.34533146402867	0.356764815368365	0.550588656338932	0.996944329911851
hsa-miR-486-3p	0.719742427385431	8.97920584714443	0.346662977799774	0.556283749972034	0.996944329911851
hsa-miR-323b-3p	0.856562944780565	7.04698838363822	0.313580018344701	0.575751466394285	0.996944329911851
hsa-miR-4732-5p	0.725476529648871	8.61100033959922	0.308648469839986	0.578768199306136	0.996944329911851
hsa-miR-320b	-0.367105011756958	11.822354874106	0.304888654908284	0.581089427503438	0.996944329911851
hsa-miR-126-3p	0.480161151633826	10.4531456209941	0.297507980067707	0.585700961554055	0.996944329911851
hsa-miR-330-3p	-0.83866672401263	6.16098544154	0.286739598686015	0.592564190640047	0.996944329911851
hsa-miR-99a-5p	0.817405213590456	6.85327022538275	0.285562666331043	0.593324327623485	0.996944329911851
hsa-let-7g-5p	-0.331046879465147	12.2824293008457	0.272420544919024	0.601952150539713	0.996944329911851
hsa-miR-1301-3p	0.811982588038319	6.44932882089877	0.271910788890752	0.602292108342214	0.996944329911851
hsa-miR-425-5p	-0.461882489204913	10.3622715136253	0.26195472076087	0.609014547985875	0.996944329911851
hsa-miR-4446-3p	0.792260098514545	6.46890828110246	0.257941359405067	0.611770078171444	0.996944329911851
hsa-miR-26b-5p	0.650414027872946	8.62089050713646	0.252028683688445	0.615879219709271	0.996944329911851
hsa-miR-128-3p	-0.705872235321553	7.88932762656521	0.245984674029193	0.620142511041177	0.996944329911851
hsa-miR-224-5p	0.582251763765434	9.13385393657951	0.245190614745501	0.62070746011051	0.996944329911851
hsa-miR-361-5p	-0.724416656582077	7.69944563533589	0.243567624924647	0.621865721962771	0.996944329911851
hsa-miR-22-3p	0.387328406757127	10.896138190194	0.239224743824874	0.624988844140783	0.996944329911851
hsa-miR-382-5p	0.555359816209603	9.25514867904382	0.230446609989761	0.631410401161298	0.996944329911851
hsa-miR-3177-3p	0.677762990738126	3.81495506174474	0.23026861472594	0.631542159772951	0.996944329911851
hsa-miR-222-3p	0.455907869052518	10.1118512165553	0.228449498639431	0.632892342304155	0.996944329911851
hsa-miR-1229-3p	-0.732892646036936	5.42828489825138	0.227999339884157	0.633227477857007	0.996944329911851
hsa-miR-6511a-3p	-0.741542809698783	6.70393447262256	0.22576308406017	0.634898382608733	0.996944329911851
hsa-miR-99b-5p	0.411793600411477	10.3331372519716	0.212107559379102	0.645327991032258	0.996944329911851
hsa-miR-483-3p	-0.452472128910332	9.91731760172834	0.198881225140596	0.655892558173769	0.996944329911851
hsa-miR-30c-5p	-0.518585257788812	9.08970276548002	0.193254264404989	0.660418621950111	0.996944329911851
hsa-miR-342-5p	-0.65129842527546	7.29929042661122	0.190662239583709	0.662561326855546	0.996944329911851
hsa-miR-3138	0.663101867336667	6.46916715421746	0.176117191224252	0.67491829909217	0.996944329911851
hsa-miR-23b-3p	-0.601912342954647	7.78045950033122	0.175505414480726	0.675451027338532	0.996944329911851
hsa-miR-139-3p	-0.64936364875467	6.55357567097731	0.170686850799433	0.679685626741834	0.996944329911851
hsa-miR-25-3p	-0.257997614069841	12.2729758398828	0.166220983006839	0.683673233804475	0.996944329911851
hsa-miR-361-3p	0.611158064784577	6.23925214878626	0.154796993548504	0.694166469253648	0.996944329911851
hsa-miR-12136	-0.38742378924537	10.1335200031726	0.154420925867248	0.694689827774382	0.996944329911851
hsa-miR-125b-5p	0.559704233234312	7.93814533110534	0.153163212879585	0.695703377374522	0.996944329911851
hsa-miR-23a-3p	0.322166567579212	10.7200539840569	0.152816737887859	0.696030522626685	0.996944329911851
hsa-let-7b-5p	0.165240920386002	15.1947657584094	0.152038595739384	0.696766814298352	0.996944329911851
hsa-miR-16-2-3p	0.537891285966847	7.9695989488301	0.147916172837509	0.700704186569855	0.996944329911851
hsa-miR-532-5p	-0.455970892298315	8.97104286937622	0.138089183316559	0.710351175258253	0.996944329911851
hsa-miR-191-5p	0.256891934958932	11.4802960949003	0.137234465000336	0.711208511777819	0.996944329911851
hsa-miR-20a-5p	0.506021869816538	3.74597650721592	0.130276410798932	0.718303580402837	0.996944329911851
hsa-miR-2110	0.533136319685043	7.21909735140755	0.127448677567664	0.721248211457857	0.996944329911851
hsa-miR-27a-3p	0.533629470879037	6.29198126168204	0.118842627474921	0.730443360136841	0.996944329911851
hsa-miR-21-5p	-0.292882319115678	10.5604924431508	0.117464687320533	0.731949922342184	0.996944329911851
hsa-miR-744-5p	0.49805419788946	7.40804887468743	0.113139680007774	0.736743804493986	0.996944329911851
hsa-miR-205-5p	-0.498557336532841	7.32416402188719	0.111226505594404	0.73889694456996	0.996944329911851
hsa-miR-589-5p	0.483191671478344	5.18951603315215	0.103758411094947	0.747504679927594	0.996944329911851
hsa-miR-107	-0.41762082055698	8.5464399065702	0.100336504693405	0.751563179911905	0.996944329911851
hsa-miR-125b-2-3p	0.462416720082221	4.6640173496156	0.0985008328543407	0.753771795246831	0.996944329911851
hsa-miR-629-3p	-0.461917720551857	7.21503565963016	0.0940285682098024	0.75924908166449	0.996944329911851
hsa-miR-320d	0.305141477327565	9.80222121591235	0.0927166311834593	0.760882793755732	0.996944329911851
hsa-miR-1228-3p	0.438156962253294	7.53130254057371	0.087159529650769	0.767946753509185	0.996944329911851
hsa-miR-15b-5p	0.409097979126065	6.23051407748733	0.0693417965119215	0.7924099498218	0.996944329911851
hsa-miR-30a-5p	-0.281129265488923	9.03005546863303	0.0563532691689023	0.812456214800705	0.996944329911851
hsa-miR-493-5p	0.357085327843921	7.03664634916262	0.0551013334885672	0.814512648803358	0.996944329911851
hsa-miR-4508	0.335523783050081	5.4603834709418	0.0488552199010312	0.825160881000345	0.996944329911851
hsa-miR-214-3p	-0.307821724618173	7.81973614564005	0.04604801242519	0.830179200299709	0.996944329911851
hsa-miR-320c	0.182061753568847	10.4456020788568	0.0450208973790127	0.832055203162779	0.996944329911851
hsa-miR-320a-3p	-0.0955329608634159	14.6351960167844	0.042437022997103	0.836875855663788	0.996944329911851
hsa-miR-323a-3p	0.315958766752224	6.39740916409904	0.0415421237191571	0.83858098925668	0.996944329911851
hsa-miR-423-5p	-0.078262641647237	15.8679812786884	0.0380659343652462	0.845392923899574	0.996944329911851
hsa-miR-487b-3p	-0.276779622285376	7.59829830375223	0.0354462071918168	0.850742872022618	0.996944329911851
hsa-miR-942-5p	0.2607476722609	4.66453275034566	0.0313921900021803	0.859442596266029	0.996944329911851
hsa-miR-24-3p	-0.110922978231764	12.1531719686329	0.0303457897285789	0.861781007167142	0.996944329911851
hsa-miR-143-3p	0.170737591933539	9.8896807029892	0.0297828624634849	0.863056196738537	0.996944329911851
hsa-let-7f-5p	0.0876101805925299	13.0400689557299	0.0246253178297031	0.875369938862668	0.996944329911851
hsa-miR-3605-3p	0.243641839728	6.29098347633348	0.0245826245134698	0.875477137377309	0.996944329911851
hsa-miR-186-5p	0.164547277480242	9.22251336843341	0.0206377843457616	0.885830062169952	0.996944329911851
hsa-miR-760	-0.19708804704758	4.0603121091115	0.0192312163115648	0.889763515786906	0.996944329911851
hsa-miR-130b-5p	-0.195930776509326	4.86728450803136	0.0177207536670811	0.894154510324508	0.996944329911851
hsa-miR-155-5p	-0.191675967104339	6.12868672659113	0.0153144349050905	0.901563560210925	0.996944329911851
hsa-miR-199b-3p	0.171807270442382	5.24351726625514	0.0130887960068892	0.908963326228184	0.996944329911851
hsa-miR-148a-3p	-0.149637532383767	8.04730279085114	0.011800274468837	0.913541859810146	0.996944329911851
hsa-miR-6803-3p	0.151845774282652	7.46495012249861	0.0105210960627029	0.918344964868446	0.996944329911851
hsa-miR-335-5p	-0.129031543361568	7.74963442566951	0.00786673998196962	0.929361387006891	0.996944329911851
hsa-miR-150-5p	0.0590958585527572	11.54860399735	0.00711473138091969	0.932814042773289	0.996944329911851
hsa-miR-484	-0.0613244983001728	11.1087664409815	0.00665542391120803	0.93501391110002	0.996944329911851
hsa-miR-379-5p	0.121886537269489	6.95903477051565	0.00633510349160713	0.936593671081592	0.996944329911851
hsa-miR-1304-5p	0.117016433989358	5.7370309376795	0.00579588987819275	0.939346635949028	0.996944329911851
hsa-miR-1306-5p	0.102895879726902	8.32596173280883	0.00579142844810816	0.939369939495114	0.996944329911851
hsa-miR-363-3p	-0.0811413782730986	7.95889318969305	0.00334825538124414	0.953880823719448	0.996944329911851
hsa-let-7i-5p	0.036309044466696	12.1049122546871	0.00330198634617727	0.954200235466552	0.996944329911851
hsa-miR-93-5p	-0.0602106780671321	9.47337850610811	0.00313425415565113	0.955377399681812	0.996944329911851
hsa-miR-144-3p	-0.0779132738563362	7.86978598305097	0.00298766454916189	0.956432332008717	0.996944329911851
hsa-miR-1249-3p	0.0820087838430982	5.88453740017411	0.00282769925596035	0.957613592956853	0.996944329911851
hsa-miR-30e-3p	0.0638048081176549	8.60466691734983	0.00239780576292837	0.960965540904255	0.996944329911851
hsa-miR-127-3p	-0.0560241196250357	6.41930523297195	0.00130027465268556	0.971249970087611	0.996944329911851
hsa-miR-423-3p	-0.0217207527056813	11.7776672786959	0.0010579868534996	0.974065465387097	0.996944329911851
hsa-miR-365a-3p	0.0465313236616363	5.30208117329768	0.000957622787929717	0.97532581377151	0.996944329911851
hsa-miR-365b-3p	0.0465313236616363	5.30208117329768	0.000957622787929717	0.97532581377151	0.996944329911851
hsa-miR-103a-3p	-0.0152402483059326	10.2929069600281	0.000276938284089261	0.986729524997455	0.996944329911851
hsa-miR-486-5p	-0.00464036856249912	19.2027653784924	0.000210254660357594	0.988451967120704	0.996944329911851
hsa-miR-215-5p	0.0182519478696138	6.28425785699124	0.00013855787250858	0.990613134184367	0.996944329911851
hsa-miR-199a-3p	-0.0173136009536454	6.52370557441103	0.000124336189768774	0.991107890229703	0.996944329911851
hsa-miR-328-3p	0.0150619733511929	7.96915689861379	0.000114506278172805	0.991466613813434	0.996944329911851
hsa-miR-378a-3p	-0.00227086071490421	6.77604414396716	2.15959274688889e-06	0.998828072272029	0.998828072272029
