# Supplementary material for: Circulating miR-28-5p is overexpressed in patients with sarcopenia despite long-term remission of Cushing’s syndrome: a pilot study
Source: Front Endocrinol (Lausanne). 2024 Jul 17;15:1410080. doi: 10.3389/fendo.2024.1410080 (PMC11289718; doi:10.3389/fendo.2024.1410080)
Supplement: Supplementary Table 2 — Over-representation analysis using Gene Ontology terms to identify pathways significantly regulated by the identified miRNAs (miR-28-5p, miR-495-3p and miR-654-5p). [file Table2.xlsx]

## Sheet: UP
ONTOLOGY
