# Supplementary material for: Circulating miR-28-5p is overexpressed in patients with sarcopenia despite long-term remission of Cushing’s syndrome: a pilot study
Source: Front Endocrinol (Lausanne). 2024 Jul 17;15:1410080. doi: 10.3389/fendo.2024.1410080 (PMC11289718; doi:10.3389/fendo.2024.1410080)
Supplement: Supplementary Table 3 — Over-representation analysis using the Kyoto Encyclopaedia of Genes and Genomes to identify pathways significantly regulated by the identified miRNAs (miR-28-5p, miR-495-3p and miR-654-5p). [file Table3.xlsx]

## Sheet: UP
ID	Description	GeneRatio	BgRatio	pvalue	p.adjust	qvalue	geneID	Count
hsa04115	p53 signaling pathway	9/196	72/7946	6.2492e-05	0,00RAP1B13038466302	0.00462759	CDKN1A/CCND3/IGF1/TP53/CDK1/CASP8/BBC3/CCNB1/MDM2	9
hsa05218	Melanoma	9/196	72/7946	6.2492e-05	0,00RAP1B13038466302	0.00462759	CDKN1A/MAPK1/IGF1/TP53/FGF2/AKT1/FGF19/HRAS/MDM2	9
hsa01524	Platinum drug resistance	9/196	73/7946	0,00006978106753ATP7A99	0,00RAP1B13038466302	0.00462759	CDKN1A/MAPK1/TP53/ATP7A/CASP8/TOP2A/AKT1/BBC3/MDM2	9
hsa05166	Human T-cell leukemia virus 1 infection	16/196	219/7946	9.5613e-05	0.00607142	0.00475549	CDKN1A/MAPK1/MAD2L1/CCND3/CRTC3/STAT5B/TP53/SRF/TGFBR2/IL15/AKT1/CREB3L2/HLA-B/CRTC1/HRAS/TCF3	16
hsa04144	Endocytosis	17/196	249/7946	0.000133032	0,0064942584806CASP83	0.00508668	SNX1/VPS37B/IQSEC2/LDLR/RAB10/RAB31/RNF41/HSPA1B/WASL/TGFBR2/SPART/CHMP1B/HLA-B/AP2M1/HRAS/RHOA/MDM2	17
hsa04218	Cellular senescence	13/196	160/7946	0.000153408	0,0064942584806CASP83	0.00508668	CDKN1A/MAPK1/CCND3/TP53/MAP2K3/CDK1/TGFBR2/AKT1/CCNB1/HLA-B/CALM3/HRAS/MDM2	13
hsa05203	Viral carcinogenesis	14/196	201/7946	0.000429623	0.0123007	0,0096345825CDK18693	CDKN1A/MAPK1/CCND3/STAT5B/TP53/SRF/CDK1/CASP8/CREB3L2/YWHAZ/HLA-B/HRAS/RHOA/MDM2	14
hsa04151	PI3K-Akt signaling pathway	20/196	354/7946	0.000439628	0.0123007	0,0096345825CDK18693	CDKN1A/MAPK1/CCND3/IGF1/TP53/MCL1/FGF2/VEGFA/COL4A1/DDIT4/HSP90AA1/PHLPP1/AKT1/IL6R/EFNA1/CREB3L2/YWHAZ/FGF19/HRAS/MDM2	20
hsa05219	Bladder cancer	6/196	41/7946	0.000456716	0.0123007	0,0096345825CDK18693	CDKN1A/MAPK1/TP53/VEGFA/HRAS/MDM2	6
hsa05214	Glioma	8/196	75/7946	0.000486745	0.0123007	0,0096345825CDK18693	CDKN1A/MAPK1/IGF1/TP53/AKT1/CALM3/HRAS/MDM2	8
hsa05220	Chronic myeloid leukemia	8/196	76/7946	0.000532706	0.0123007	0,0096345825CDK18693	CDKN1A/MAPK1/STAT5B/TP53/TGFBR2/AKT1/HRAS/MDM2	8
hsa05215	Prostate cancer	9/196	97/7946	0.000617512	0.0125131	0.00980094	CDKN1A/MAPK1/IGF1/TP53/HSP90AA1/AKT1/CREB3L2/HRAS/MDM2	9
hsa05161	Hepatitis B	12/196	162/7946	0.000640432	0.0125131	0.00980094	CDKN1A/MAPK1/STAT5B/TP53/MAP2K3/CASP8/TAB2/TGFBR2/AKT1/CREB3L2/YWHAZ/HRAS	12
hsa04933	AGE-RAGE signaling pathway in diabetic complications	9/196	100/7946	0.000771389	0.0139952	0.0109618	MAPK1/STAT5B/VEGFA/COL4A1/TGFBR2/CCL2/AKT1/DIAPH1/HRAS	9
hsa05210	Colorectal cancer	8/196	86/7946	0.00121547	0.020582	0.016121	CDKN1A/MAPK1/TP53/TGFBR2/AKT1/BBC3/HRAS/RHOA	8
hsa05163	Human cytomegalovirus infection	14/196	225/7946	0.00130568	0,0AKT1277335354343	0.0162351	CDKN1A/MAPK1/TP53/VEGFA/CASP8/CCL2/AKT1/IL6R/CREB3L2/HLA-B/CALM3/HRAS/RHOA/MDM2	14
hsa04668	TNF signaling pathway	9/196	112/7946	0,00DIAPH130981005077	0.0258379	0.0202377	MAPK1/MAP2K3/CXCL5/CASP8/TAB2/IL15/CCL2/AKT1/CREB3L2	9
hsa05216	Thyroid cancer	5/196	37/7946	0,0019905SNX131725	0,0280CCNB1039714342	0.022001	CDKN1A/MAPK1/CCDC6/TP53/HRAS	5
hsa05202	Transcriptional misregulation in cancer	12/196	186/7946	0.00212222	0.0283707	0.0222216	CDKN1A/IGF1/TP53/PBX3/MEIS1/BMI1/PER2/TGFBR2/HMGA2/KMT2A/TCF3/MDM2	12
hsa04010	MAPK signaling pathway	16/196	295/7946	0.0025101	0.0318783	0.0249689	MAPK1/RAP1B/IGF1/TP53/MAP2K3/SRF/FGF2/VEGFA/TAB2/HSPA1B/TGFBR2/AKT1/EFNA1/MAPKAPK5/FGF19/HRAS	16
hsa04914	Progesterone-mediated oocyte maturation	8/196	99/7946	0.00298849	0.0361465	0.028312	MAPK1/MAD2L1/IGF1/CDK1/HSP90AA1/AKT1/CCNB1/FZR1	8
hsa01521	EGFR tyrosine kinase inhibitor resistance	7/196	79/7946	0.00322843	0,037273749369MAPK1	0.0291949	MAPK1/IGF1/FGF2/VEGFA/AKT1/IL6R/HRAS	7
hsa04110	Cell cycle	9/196	124/7946	0.00346828	0.0383019	0.0300002	CDKN1A/MAD2L1/CCND3/TP53/CDK1/YWHAZ/CCNB1/FZR1/MDM2	9
hsa05226	Gastric cancer	10/196	149/7946	0.00370816	0.0392447	0,0307RHOA057082092	CDKN1A/MAPK1/TP53/FGF2/LRP6/TGFBR2/AKT1/ABCB1/FGF19/HRAS	10
hsa04150	mTOR signaling pathway	10/196	153/7946	0.0044773	0.0454894	0.0356299	MAPK1/SLC7A5/IGF1/CASTOR2/DDIT4/LRP6/AKT1/RICTOR/HRAS/RHOA	10
hsa04068	FoxO signaling pathway	9/196	131/7946	0.00498779	0.0487269	0.0381657	CDKN1A/MAPK1/CALM354/IGF1/TGFBR2/AKT1/CCNB1/HRAS/MDM2	9
